# Supplementary material for: Selective photocatalytic CO2 reduction by cobalt dicyanamide
Source: Royal Society of Chemistry journal article supplement (doi:10.1039/d2dt01606k), 2022-01-01
Supplement: d2dt01606k1.pdf [file d2dt01606k1.pdf]

## Supporting Information

# Selective Photocatalytic CO<sub>2</sub> Reduction by Cobalt Dicyanamide

*Sina Sadigh Akbari,<sup>‡</sup> Ferdi Karadas<sup>‡†\*</sup>*

<sup>‡</sup> Department of Chemistry, Faculty of Science, Bilkent University, 06800 Ankara, Turkey.

<sup>‡</sup> UNAM - National Nanotechnology Research Center, Institute of Materials Science and  
Nanotechnology, Bilkent University, 06800 Ankara, Turkey.

\* Corresponding author: Ferdi Karadas, Email: [karadas@fen.bilkent.edu.tr](mailto:karadas@fen.bilkent.edu.tr).

**Table S1** ATR- FTIR data of **Co-dca** sample.

| Vibration                                 | Wavenumber (cm <sup>-1</sup> ) |
|-------------------------------------------|--------------------------------|
| $\delta(\text{N}-\text{C}\equiv\text{N})$ | 502                            |
| $\gamma(\text{N}-\text{C}\equiv\text{N})$ | 526                            |
| $\delta(\text{N}-\text{C}\equiv\text{N})$ | 681                            |
| $\nu(\text{N}-\text{C})$                  | 963                            |
| $\nu(\text{N}-\text{C})$                  | 1314                           |
| $\nu(\text{C}\equiv\text{N})$             | 2207                           |
| $\nu(\text{C}\equiv\text{N})$             | 2270                           |

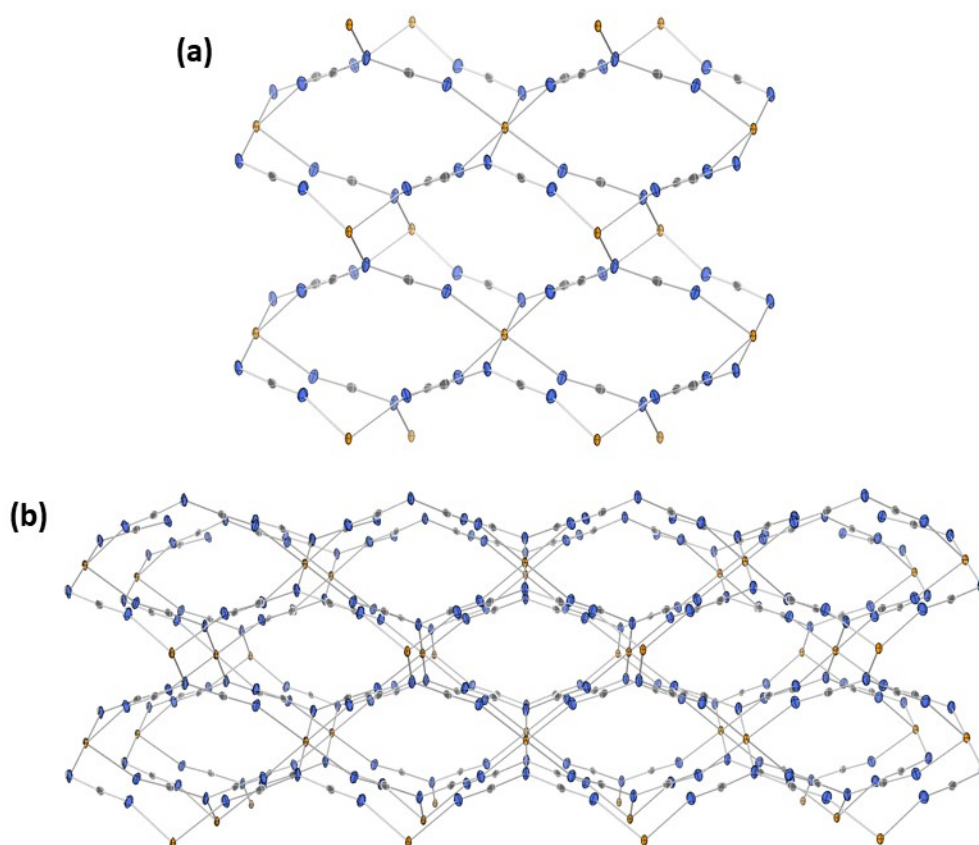

**Fig. S1** (a) 3D structure, and (b) perspective view of  $\text{Co(dca)}_2$  (Color code: Co = orange; C = gray; N = blue).

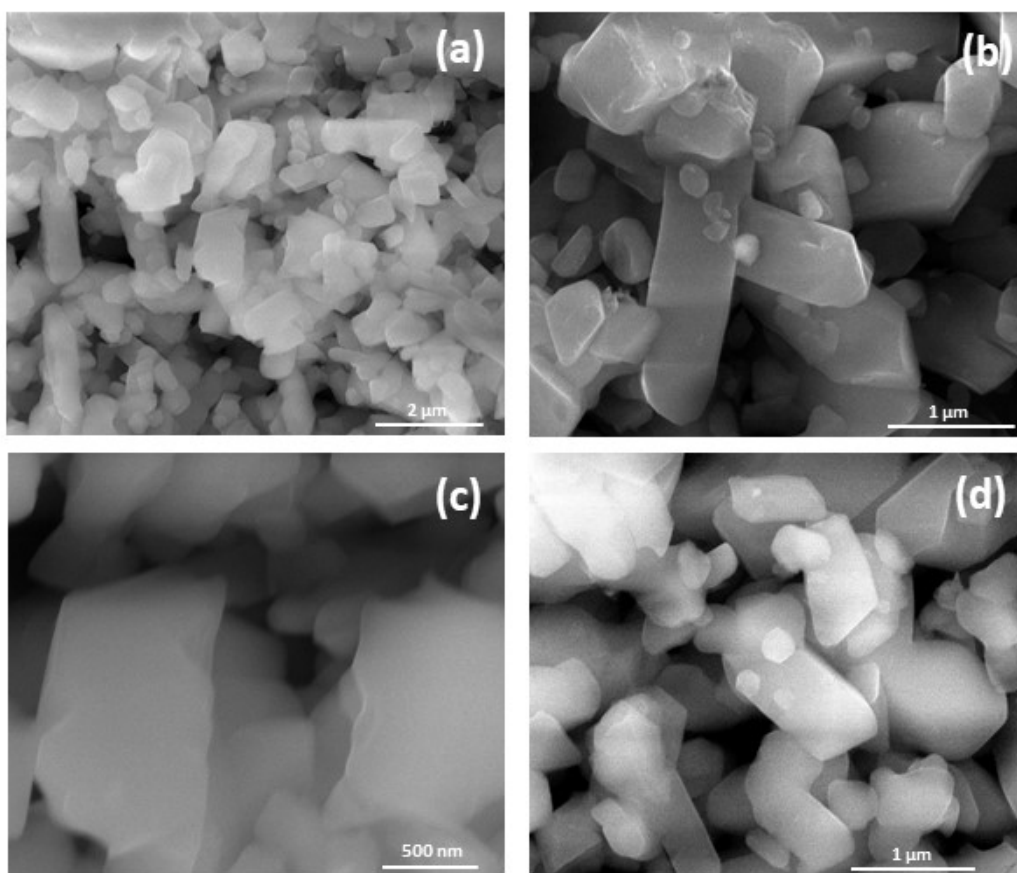

**Fig. S2** (a-d) SEM images of **Co-dca**.

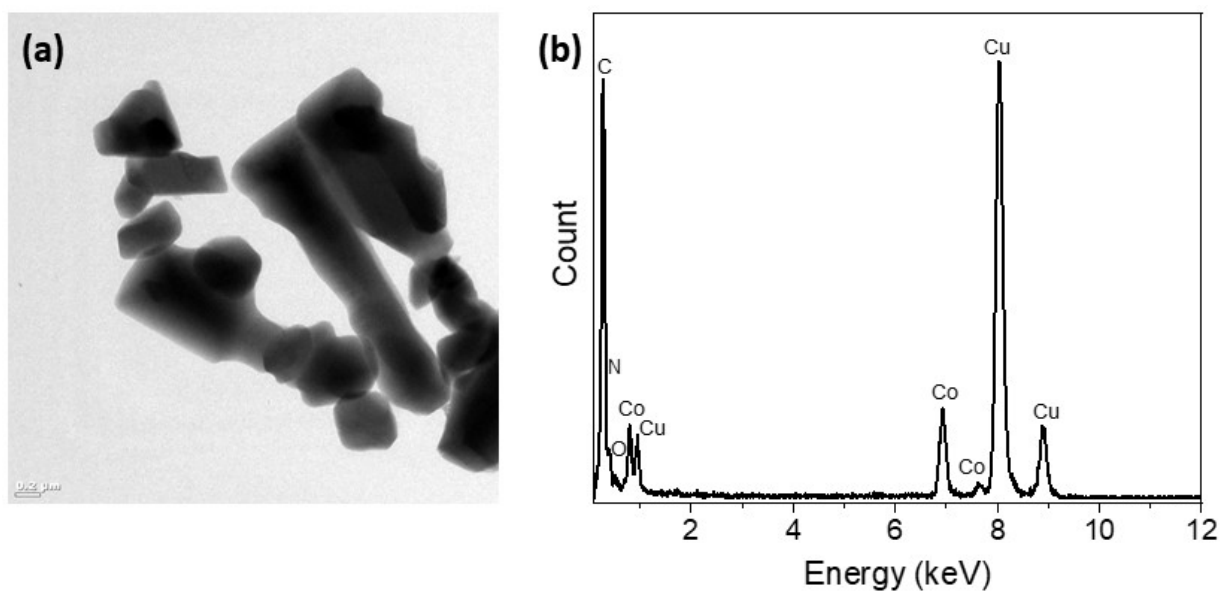

**Fig. S3** (a) TEM image and (b) EDS elemental analysis of **Co-dca**. The signal for Cu is from the TEM grid.

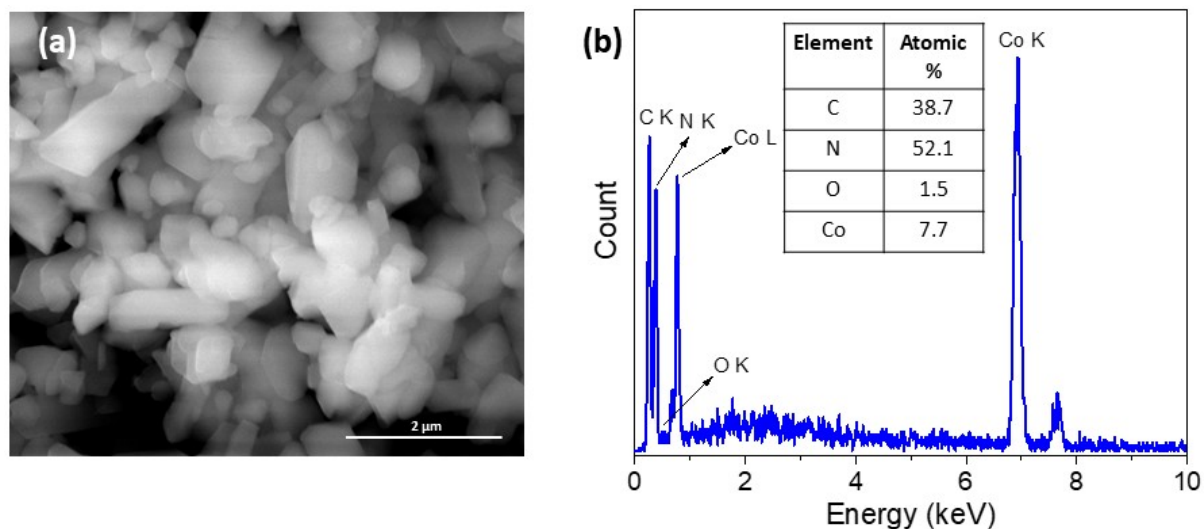

**Fig. S4** (a) SEM image and (b) SEM-EDS analysis of **Co-dca**. Inset: The atomic ratio of all elements for the **Co-dca**.

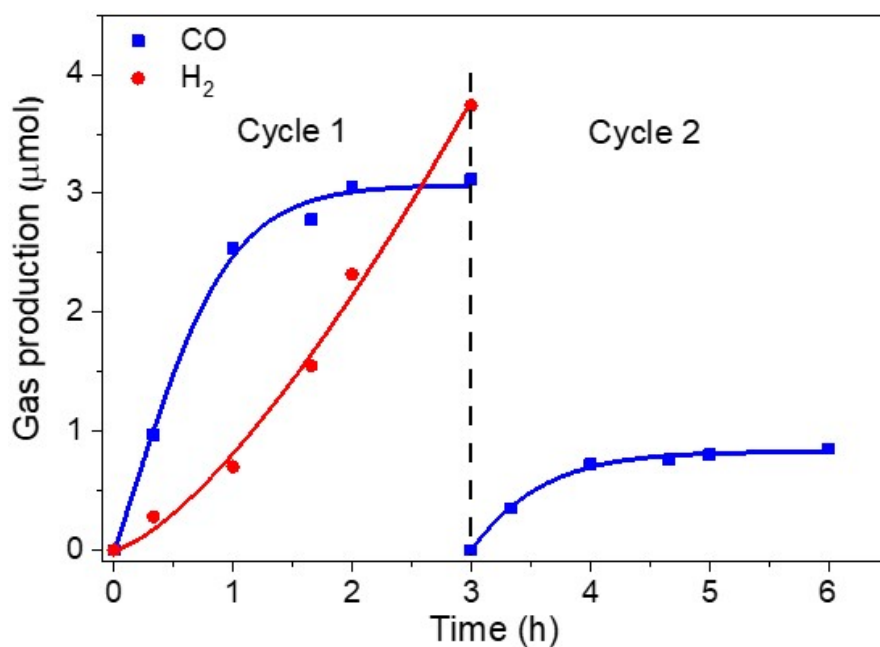

**Fig. S5** (a) Yields of H<sub>2</sub> and CO from the CO<sub>2</sub> under visible light irradiation over 2 cycles. Reaction conditions: 10 mg **Co-dca**, 3.74 mg [Ru(bpy)<sub>3</sub>]Cl<sub>2</sub>·6H<sub>2</sub>O (0.5 mM), 8 mL acetonitrile, 2 mL TEOA, 25 °C, 30 min purging with CO<sub>2</sub>, under visible light irradiation ( $\lambda > 420$  nm). After the first cycle, the catalyst was dispersed in a fresh solution, and 3.74 mg of Ru photosensitizer was added.

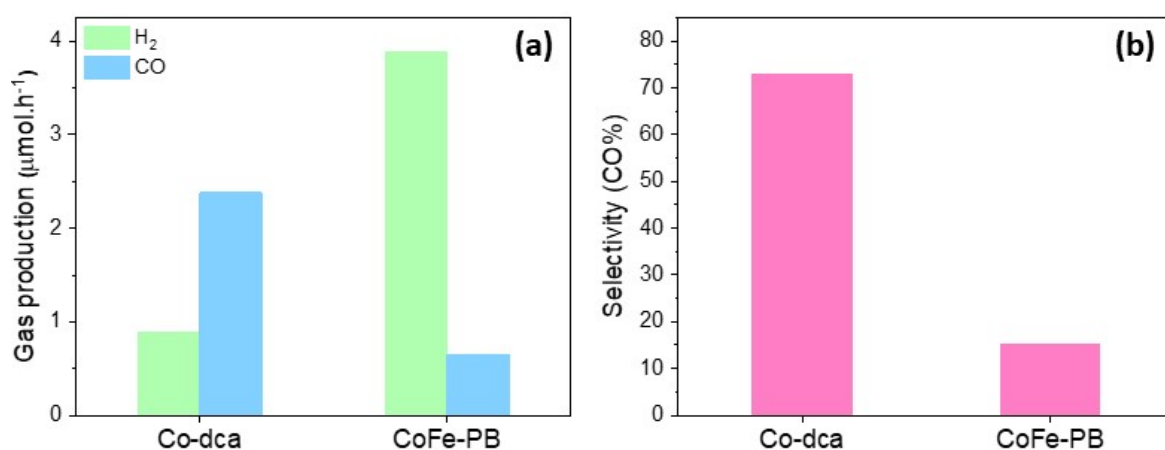

**Fig. S6** Comparison of (a) the photocatalytic CO and  $\text{H}_2$  evolution activity and (b) corresponding selectivity of photocatalytic  $\text{CO}_2$  to CO conversion over  $\text{H}_2$  evolution of **Co-dca** and CoFe-PB. Reaction conditions: 10 mg catalyst, 7.48 mg  $[\text{Ru}(\text{bpy})_3]\text{Cl}_2\cdot 6\text{H}_2\text{O}$  (1 mM), 8 mL acetonitrile, 2 mL TEOA, 25  $^\circ\text{C}$ , 30 min purging with  $\text{CO}_2$ , under visible light irradiation ( $\lambda > 420 \text{ nm}$ ).

**Preparation of CoFe-PB:** For the synthesis of CoFe-PB,  $\text{K}_3[\text{Fe}(\text{CN})_6]$  (2 mmol) was dissolved in deionized water (20 mL), then an aqueous solution of  $\text{Co}(\text{NO}_3)_2\cdot 6\text{H}_2\text{O}$  (3 mmol in 20 mL water) was added to the above solution at room temperature. The obtained slurry was stirred for 1 h and collected by centrifugation after rinsing with water. The obtained solid was dried at 75 $^\circ\text{C}$ .

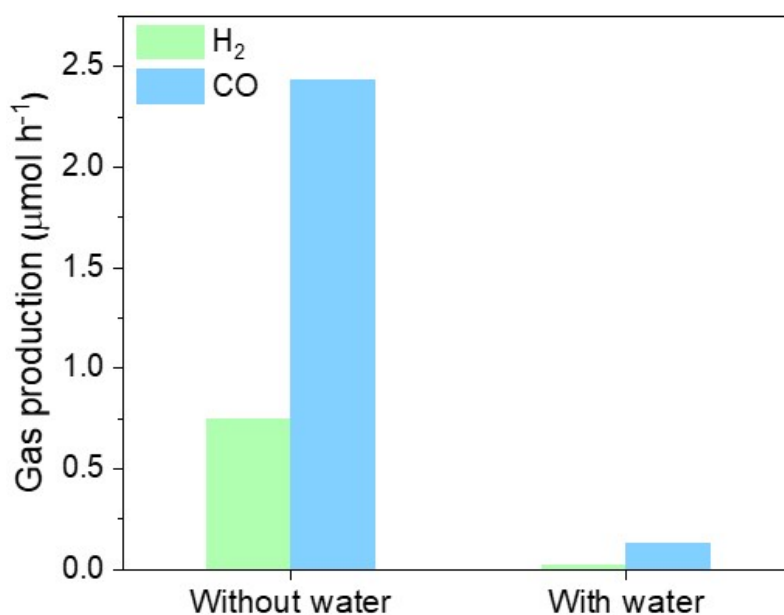

**Fig. S7** Photocatalytic  $\text{CO}_2$  reduction activity of **Co-dca** sample without water (MeCN/TEOA, 4/1, v/v) and with water (MeCN/ $\text{H}_2\text{O}$ /TEOA, 3/1/1, v/v/v).

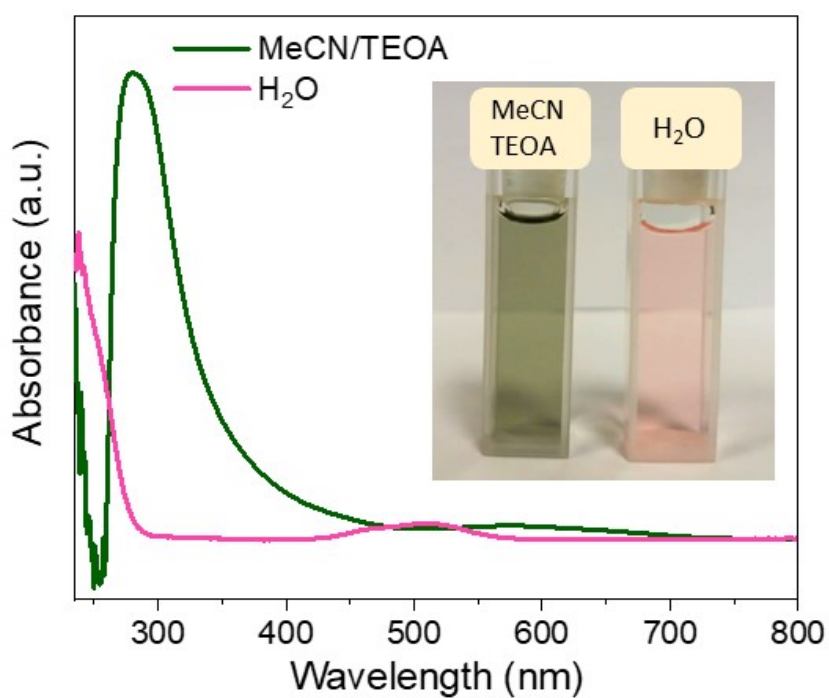

**Fig. S8** The UV-Vis absorption spectra of **Co-dca** (10 mg) in MeCN/TEOA and H<sub>2</sub>O solutions. Inset: **Co-dca** powder dissolved in MeCN/TEOA and H<sub>2</sub>O solutions.

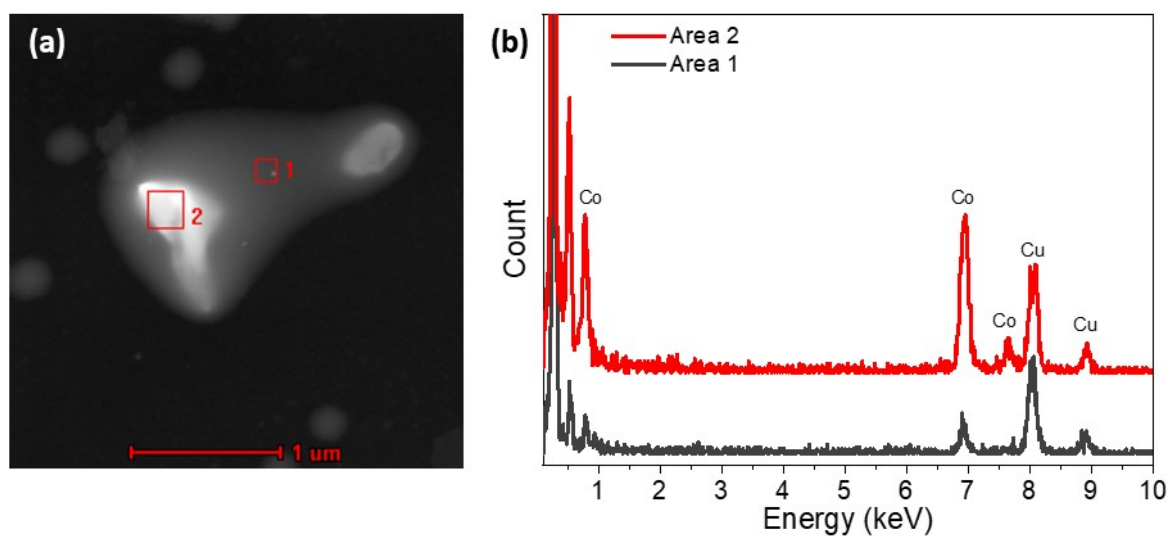

**Fig. S9** (a) HAADF-STEM images of **Co-dca** for post-catalytic sample. (b) EDS elemental analysis of selected areas. The signal for Cu is from the TEM grid.

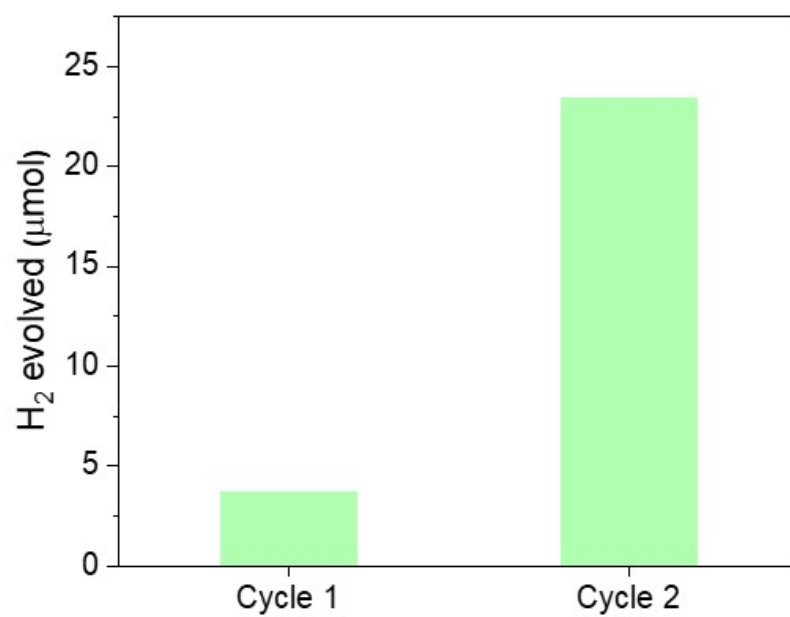

**Fig. S10** The amount of H<sub>2</sub> evolved during the first and second cycles.
